# Supplementary material for: Synaptic gene expression changes in frontotemporal dementia due to the MAPT 10+16 mutation
Source: PubMed Central journal article supplement (PMC11030522; doi:10.1101/2024.04.09.24305501), 2024-04-12
Supplement: NIHPP2024.04.09.24305501v1-supplement-1.pdf [file NIHPP2024.04.09.24305501v1-supplement-1.pdf]

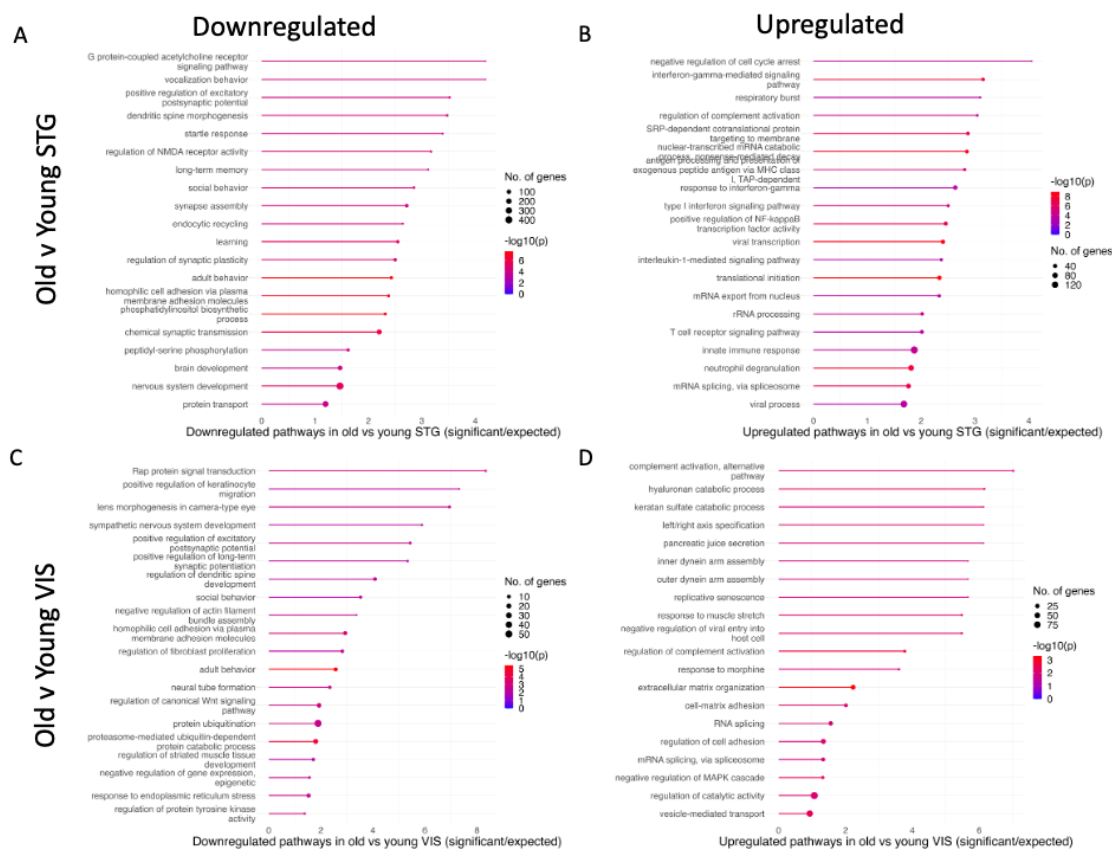

**Supplementary Figure 1:** When comparing older vs younger controls (cutoff 65 years of age), the top 20 down-regulated (A, C) and up-regulated (B,D) pathways in Gene Ontology analysis of RNAseq data reveal that in both STG (A, B), and visual cortex (C, D), expression of genes involved in synaptic function are decreased and genes involved in inflammation and regulation of the cell cycle are increased.
